# Supplementary material
Source: publisher figshare collection journal article supplement (https://acs.figshare.com/ndownloader/files/25779206)
Supplement: Supplementary file 1 [file 25779206]

## **SUPPORTING INFORMATION**

### **The hapten-branched polyethylenimine (PEI) as a new antigen affinity ligand to purify antibodies with high efficiency and specificity**

Xiangning Han<sup>1</sup>, Hong Lin<sup>1</sup>, Limin Cao<sup>1</sup>, Xiangfeng Chen<sup>2</sup>, Luefeng Wang<sup>1</sup>, Hongwei Zheng<sup>1</sup>, Ziang Zhang<sup>1</sup>, Tushar Ramesh Pavase<sup>1</sup>, Sai Wang<sup>1</sup>, Xun Sun<sup>1</sup>, Jianxin Sui<sup>1\*</sup>

<sup>1</sup>College of Food Science and Engineering, Ocean University of China, 5 Yushan Rd, 266100, Qingdao, China.

<sup>2</sup>Shandong Analysis and Test Centre, Qilu University of Technology (Shandong Academy of Sciences), 19 Keyuan Rd, 250014, Jinan, China.

**KEYWORDS:** Enrofloxacin, polyethylenimine (PEI), affinity purification, sensitivity, specificity.

This **Supporting Information** file includes solutions and buffers, results of NMR, the BLI method and plate layout.

### ***1. Solutions and buffers***

#### **Buffers in column purification section:**

Coupling buffer A: 8.4 g  $\text{NaHCO}_3$ , 29.22 g  $\text{NaCl}$ , dissolved in 1 L distilled  $\text{H}_2\text{O}$ , adjusted pH to 7.4.

Coupling buffer B: 8.4 g  $\text{NaHCO}_3$ , 29.22 g  $\text{NaCl}$ , dissolved in 1 L distilled  $\text{H}_2\text{O}$ , adjusted pH to 7.0.

Blocking buffer: 12.11 g Tris, 1 L  $\text{H}_2\text{O}$ , adjusted pH to 8.0 by  $\text{HCl}$ .

Washing buffer A: 8.2 g  $\text{NaAc}$ , 29.22 g  $\text{NaCl}$ , 1 L  $\text{H}_2\text{O}$ , adjusted pH to 4.0 by  $\text{HAc}$ .

Washing buffer B: Blocking buffer containing 29.22 g  $\text{NaCl}$ , adjusted pH to 8.0 by  $\text{HCl}$ .

Elution Buffer: 7.5 g glycine, 1 L  $\text{H}_2\text{O}$ , adjusted pH to 2.5 by  $\text{HCl}$ .

Neutralizing buffer: 12.11 g Tris, 1 L  $\text{H}_2\text{O}$ , adjusted pH to 8.5 by  $\text{HCl}$ .

#### **Buffers in ELISA section:**

Coating buffer: Carbonate buffered saline (CBS), 1.59 g  $\text{Na}_2\text{CO}_3$ , 2.93 g  $\text{NaHCO}_3$ , dissolved in 1 L distilled  $\text{H}_2\text{O}$ , filtered by 0.45  $\mu\text{m}$  filter membrane, adjusted pH to 9.6.

Dilution buffer: Phosphate buffered saline (PBS), 40 g  $\text{NaCl}$ , 1 g  $\text{KCl}$ , 14.5 g  $\text{Na}_2\text{HPO}_4 \cdot 12 \text{H}_2\text{O}$ , 1 g  $\text{KH}_2\text{PO}_4$ , 5 L  $\text{H}_2\text{O}$ , filtered by 0.45  $\mu\text{m}$  filter membrane, adjusted pH to 7.4.

Washing buffer: PBST, PBS containing 0.05% (v/v) Tween-20.

Blocking buffer: PBST containing 5% (w/v) skim milk powder.

## 2. The results of NMR

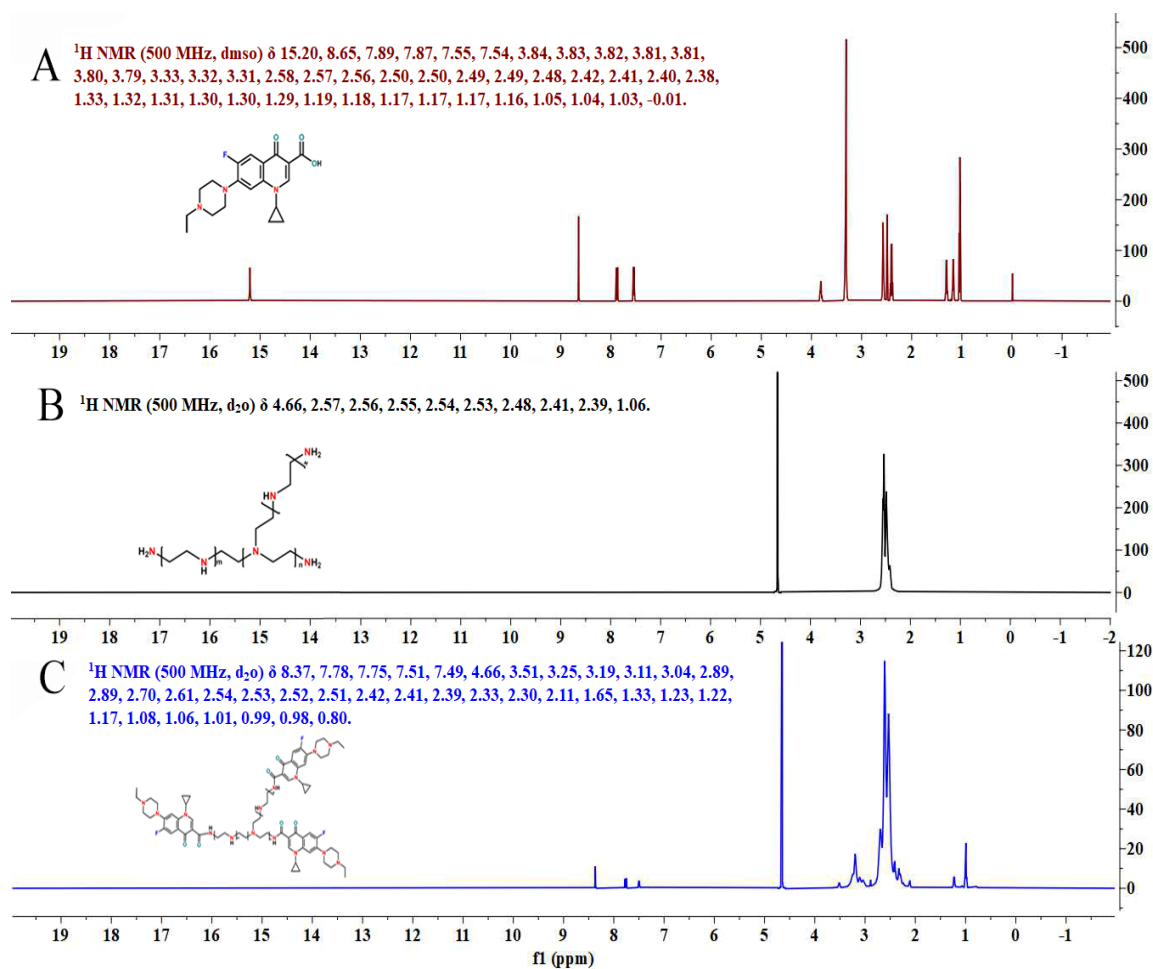

**Figure S1.** The  $^1\text{H}$  NMR results of ENR, PEI and ENR-PEI. (A) was the  $^1\text{H}$  NMR of the ENR. (B) was the  $^1\text{H}$  NMR of the PEI. (C) was the  $^1\text{H}$  NMR of the ENR-PEI.

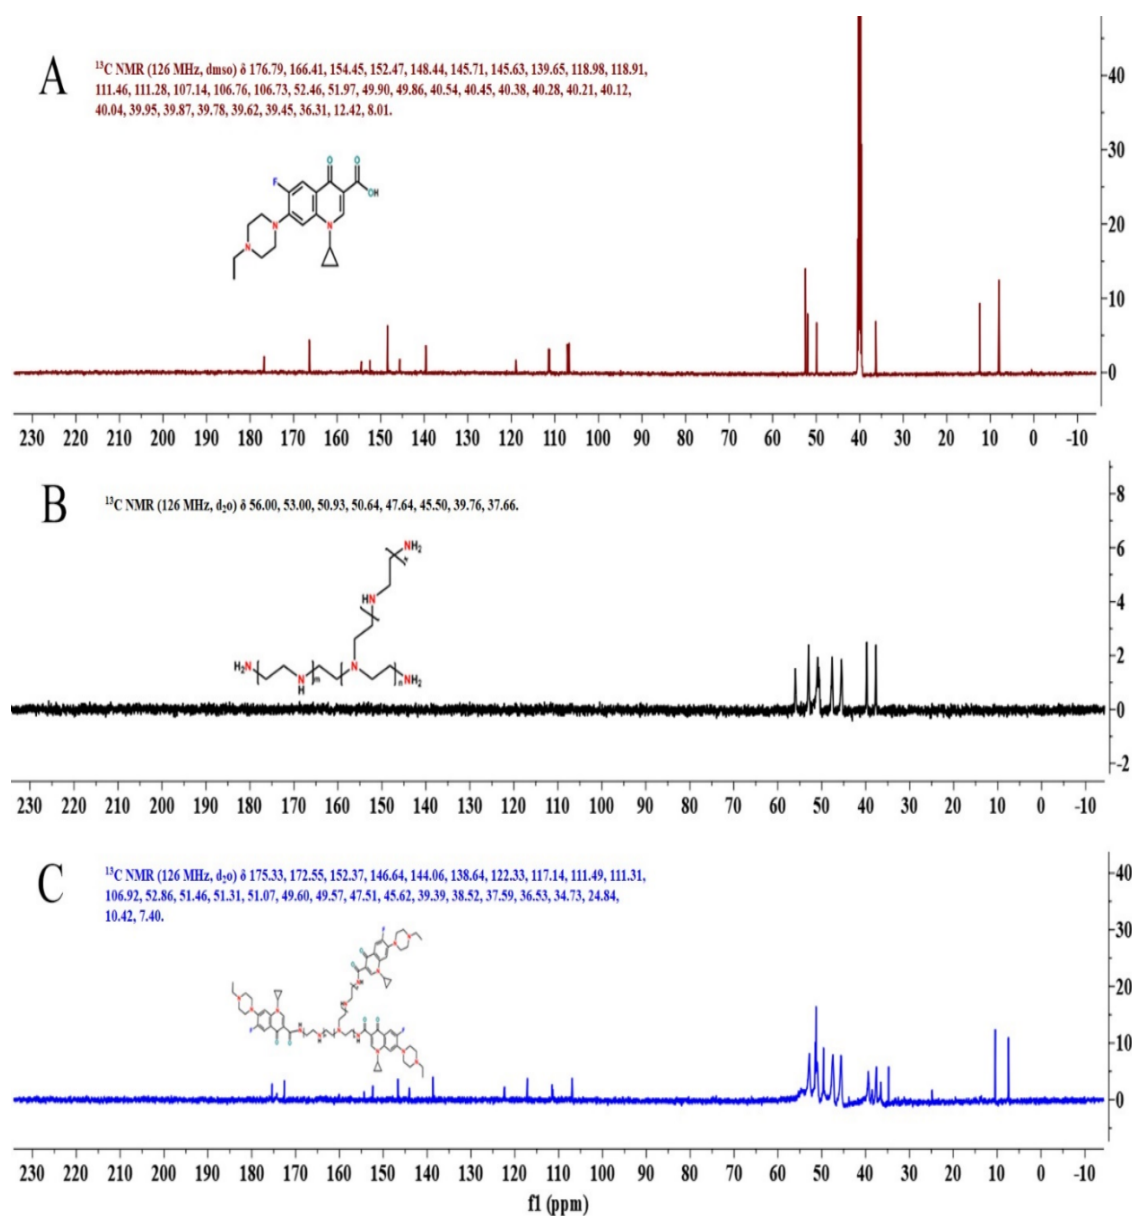

**Figure S2.** The  $^{13}\text{C}$  NMR results of ENR, PEI and ENR-PEI. (A) was the  $^{13}\text{C}$  NMR of the ENR. (B) was the  $^{13}\text{C}$  NMR of the PEI. (C) was the  $^{13}\text{C}$  NMR of the ENR-PEI.

### 3. Determination of unspecific binding of purified antibody with the carrier by BLI

To evaluate the specificity of purified antibody, BLI with an Octet® RED96 System was used to determine the combination of purified antibody with OVA and BSA both by ENR-PEI affinity column and protein A to simulate ELISA process. The OVA, BSA were biotinylated according to the instruction of Biotinylation Kit. As shown in **Figure**

**S3** the assay procedure includes five steps: (1) baseline (1 min); (2) loading (3 min); (3) baseline (3 min); (4) association (3 min); (5) baseline (5 min). All the solutions were 0.02% Tween-20 in PBS. The response data obtained from the reaction surface were normalized by subtracting the signal simultaneously acquired from the blank surface to eliminate unspecific binding and buffer-induced interferometry spectrum shift.

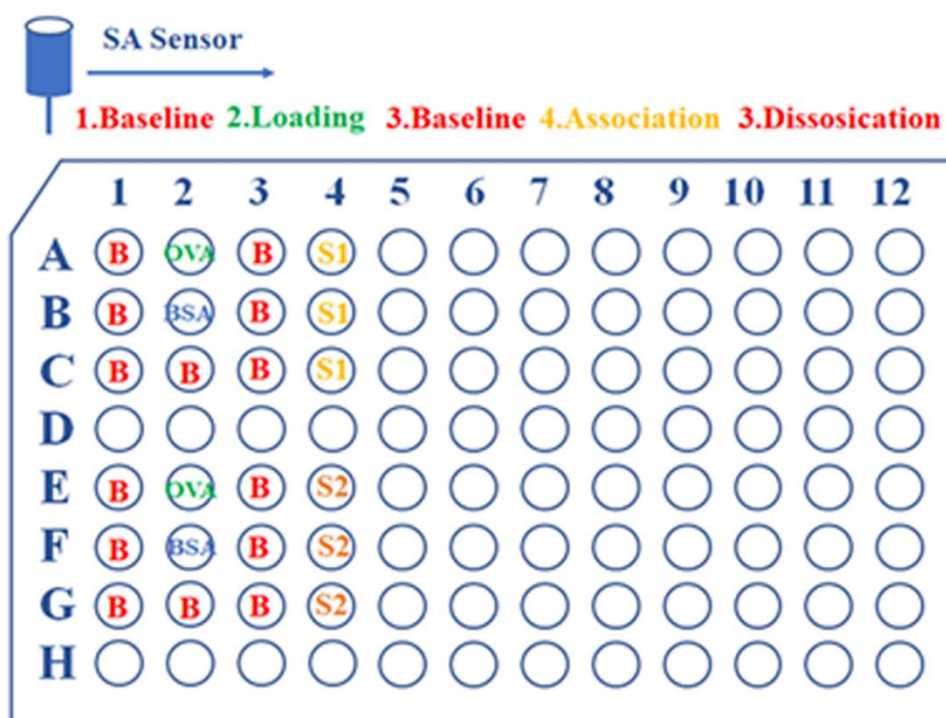

**Figure S3.** BLI technology assay principle process and plate layout. B was Buffer, S1 was the purified antibody by protein A, S2 was the purified antibody by ENR-PEI affinity column.
